# Supplementary material for: Self-supporting poly(3,4-ethylenedioxythiophene) and Fe3C Co-decorated electrospun carbon nanofibers as Li2S supporters for lithium–sulfur batteries
Source: Royal Society of Chemistry journal article supplement (doi:10.1039/d4nr04989f), 2025-01-01
Supplement: d4nr04989f1.pdf [file d4nr04989f1.pdf]

## Self-Supporting Poly (3,4-ethylenedioxythiophene) and Fe<sub>3</sub>C Co-Decorated Electrospun Carbon Nanofibers as Li<sub>2</sub>S Supporter for Lithium Sulfur Batteries

Na Yang,<sup>a</sup> Yuanxiao Ji,<sup>a</sup> Jiyuan Zhang,<sup>a</sup> Jiarui Xue,<sup>a</sup> Weiye Zhang,<sup>a</sup> Xuexia He,<sup>a</sup> Qi Li,<sup>a</sup> Zhibin Lei<sup>a,\*</sup>, Zonghuai Liu<sup>a</sup> and Jie Sun<sup>a,\*</sup>

<sup>a</sup>Key Laboratory of Applied Surface and Colloid Chemistry (MOE), Shaanxi Key Laboratory for Advanced Energy Devices, Shaanxi Engineering Laboratory for Advanced Energy Technology, School of Materials Science and Engineering, Shaanxi Normal University, 620 West Chang'an Street, Xi'an, Shaanxi 710119, China.

### Supporting Information

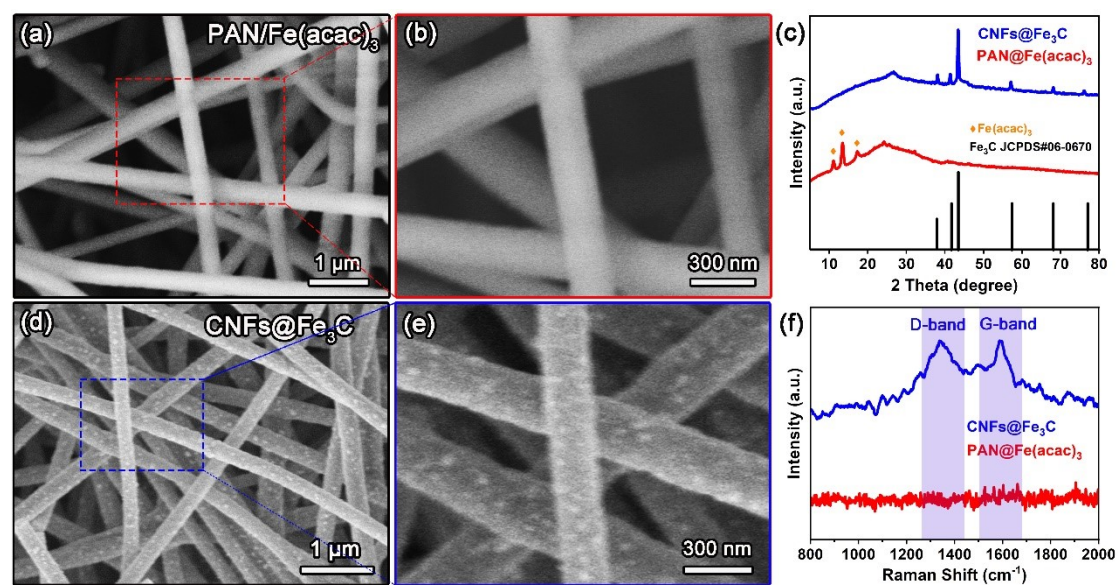

**Figure S1** The phase structure and morphology characterization results of PAN/Fe(acac)<sub>3</sub> and CNFs@Fe<sub>3</sub>C composite nanofiber membranes: (a, b) SEM images of PAN/Fe(acac)<sub>3</sub>, (c) XRD pattern, (d, e) SEM images of CNFs@Fe<sub>3</sub>C, (f) Raman spectra.

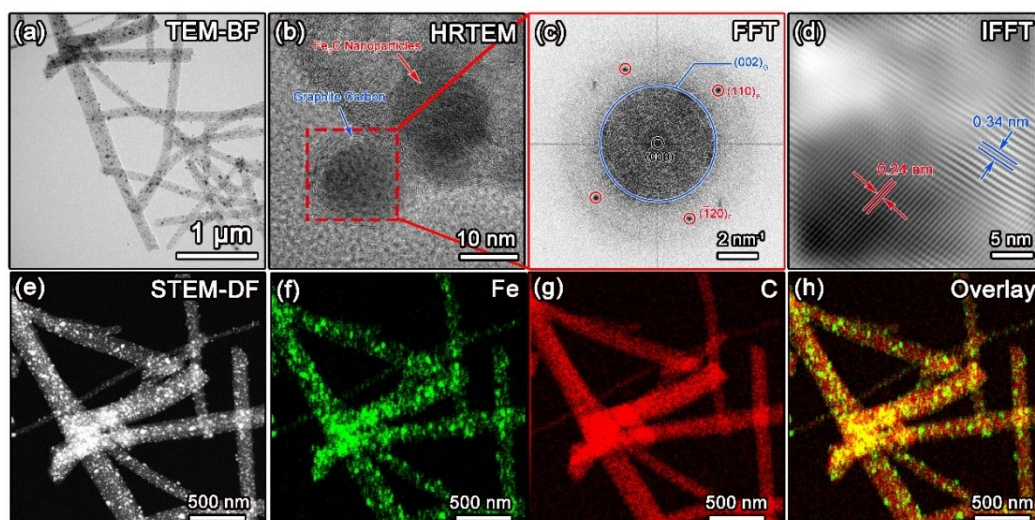

**Figure S2** TEM characterization results of CNFs@Fe<sub>3</sub>C nanofiber membranes: (a) TEM-BF image, (b) HRTEM image, (c) Corresponding FFT figure, (d) IFFT figure, (e) STEM-DF image, (f-h) EDX mapping results of the distribution of Fe, C and overlay mapping.

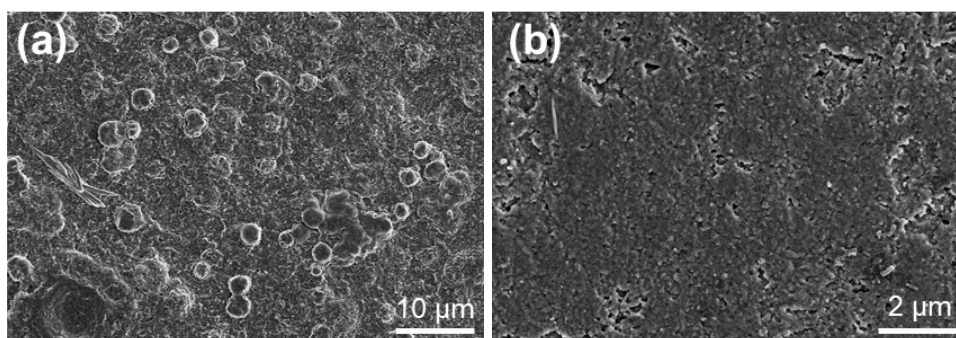

**Figure S3** SEM images of the P@CNFs@Fe<sub>3</sub>C-16%-Li<sub>2</sub>S cathode after 1000 cycles under different magnifications (a, b).

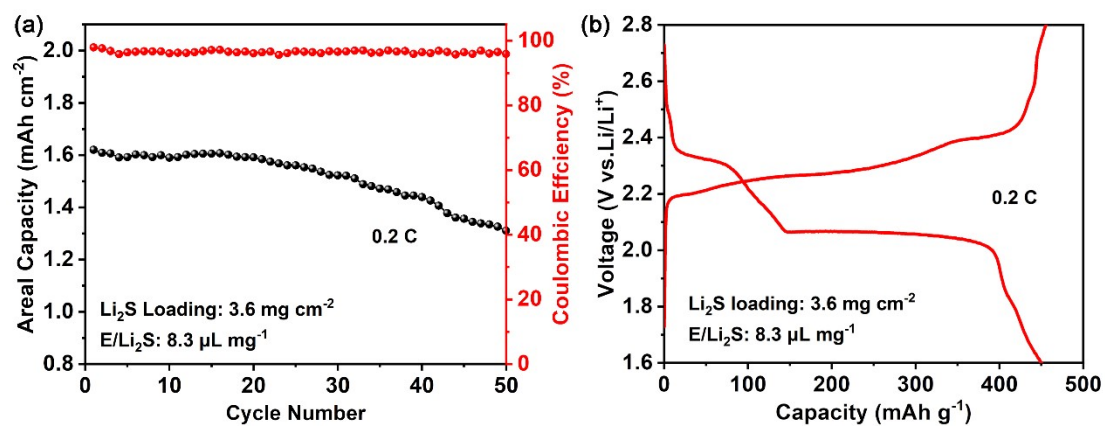

**Figure S4** The cyclic performance (a) and corresponding galvanostatic charge-discharge curve (b) of P@CNFs@Fe<sub>3</sub>C-16% cathode under high Li<sub>2</sub>S loading amount and low E/Li<sub>2</sub>S ratio.

**Table S1** Electrochemical performance comparison of the recent reported Li<sub>2</sub>S-based cathode in Li-S batteries

| Cathode Materials                                    | Cyclic Performance<br>(mAh g <sup>-1</sup> ) | Li <sub>2</sub> S loading amount<br>(mg cm <sup>-2</sup> ) | References |
|------------------------------------------------------|----------------------------------------------|------------------------------------------------------------|------------|
| Li <sub>2</sub> S@C                                  | 411 (0.1C, 50 cycles)                        | 0.54                                                       | 1          |
| MWCNT-Li <sub>2</sub> S                              | 550 (0.1C, 100 cycles)                       | 1                                                          | 2          |
| Li <sub>2</sub> S/CNT/C-N/O                          | 671 (0.1C, 200 cycles)                       | ~2                                                         | 3          |
| Li <sub>2</sub> S-rGO                                | 315 (0.1C, 100 cycles)                       | 0.96                                                       | 4          |
| ML-Ti <sub>3</sub> C <sub>2</sub> /Li <sub>2</sub> S | 450 (0.2C 100 cycles)                        | 0.8                                                        | 5          |
| Li <sub>2</sub> S/FWNTs@rGO NBF                      | 868 (0.2C, 300 cycles)                       | 1.0-1.5                                                    | 6          |
| Li <sub>2</sub> S-ZnS@NC                             | 640 (0.2C, 100 cycles)                       | 2                                                          | 7          |
| Li <sub>2</sub> S-PPy                                | 785 (0.2C, 400 cycles)                       | ~1                                                         | 8          |
| Li <sub>2</sub> S-PAN                                | 665 (0.5C, 250 cycles)                       | 2.5                                                        | 9          |
| Nano-Li <sub>2</sub> S/rGO                           | 898 (0.5C, 145 cycles)                       | 0.8-1.5                                                    | 10         |
| P@CNFs@Fe <sub>3</sub> C                             | 580 (0.1C, 100 cycles)                       | 1.2                                                        | This work  |

## References

1. K. Cai, M.-K. Song, E. J. Cairns and Y. Zhang, *Nano Letter*, 2012, **12**, 6474–6479.
2. F. Wu, A. Magasinski and G. Yushin, *Journal of Energy Chemistry*, 2013, **2**, 6064–6070.
3. Y. Peng, Y. Zhang, Z. Wen, Y. Wang, Z. Chen, B.-J. Hwang and J. Zhao, *Chemical Engineering Journal*, 2018, **346**, 57–64.
4. Y. Kim, Y. Noh, S. Lee, J. Bae, Y. Kim, H. Ahn and W. B. Kim, *ChemSusChem.*, 2020, **12**, 824–829.
5. X. Liang, J. Yun, K. Xu, H. Xiang, Y. Wang, Y. Sun and Y. Yu, *Journal of Energy Chemistry*, 2019, **39**, 176–181.
6. Y. Chen, S. Lu, J. Zhou, W. Qin and X. Wu, *Advanced Functional Materials*, 2017, **27**, 1700987.
7. M. Yu, S. Zhou, Z. Wang, W. Pei, X. Liu, C. Liu, C. Yan, X. Meng, S. Wang, J. Zhao and J. Qiu, *Advanced Functional Materials*, 2019, **29**, 1905986.
8. H. Yan, H. Wang, D. Wang, X. Li, Z. Gong and Y. Yang, *Nano Letters*, 2019, **19**, 3280–3287.
9. Z. W. Seh, H. Wang, P.-C. Hsu, Q. Zhang, W. Li, G. Zheng, H. Yao and Y. Cui, *Energy & Environmental Science*, 2013, **7**, 672–676.
10. C. Wang, X. Wang, Y. Yang, A. Kushima, J. Chen, Y. Huang and J. Li, *Nano Letters*, 2015, **15**, 1796–1802.
